# Supplementary material for: Socio-environmental correlates of physical activity in patients with chronic obstructive pulmonary disease (COPD)
Source: PubMed Central journal article supplement — Thorax. 2017 Mar 1;72(9):796–802. doi: 10.1136/thoraxjnl-2016-209209 (PMC5738536; doi:10.1136/thoraxjnl-2016-209209), 2017-03-01
Supplement: thoraxjnl-2016-209209supp001.pdf [file thoraxjnl-2016-209209supp001.pdf]

## **Socio-environmental correlates of physical activity in patients with chronic obstructive pulmonary disease (COPD)**

### **SUPPLEMENTARY FILE**

- **Sample size power estimations.**
- **Table S1. Description of the five municipalities included in the study.**
- **Table S2. Association between socio-demographic and clinical characteristics, and socio-environmental determinants in COPD patients.**
- **Table S3. Association between socio-demographic and clinical characteristics, and physical activity in COPD patients.**
- **Table S4. Adjusted association between socio-environmental characteristics and secondary outcomes of physical activity amount in COPD patients.**
- **Table S5. Adjusted association between socio-environmental characteristics and secondary outcomes of physical activity amount in COPD patients, according to sex, COPD severity, municipality and neighbourhood deprivation.**
- **Table S6. Adjusted association between socio-environmental characteristics and physical activity amount and intensity (all parameters) in COPD patients, after excluding patients with extreme values in ( $\geq 99$ th percentile) physical activity variables.**
- **Table S7. Adjusted association between socio-environmental characteristics and physical activity amount and intensity (all parameters) in COPD patients, using mixed effect models to account for the potential correlation between subjects within a municipality.**
- **Figure S1. Distribution of physical activity amount and intensity according to residential surrounding greenness within different buffers using network and Euclidean distances in COPD patients.**

## Sample size power estimations

Provided sample size was fixed by the primary objective of the Urban Training<sup>TM</sup> study, prior to any analysis we calculated whether the available number of patients (n=410) would allow the identification of significant differences in physical activity between groups. Calculations with the software GRANMO 7.10<sup>1</sup> showed that, using data from previous literature about physical activity in COPD patients from the same geographical area<sup>2</sup> (one third of patients (n=137) was estimated to be physically inactive, and two thirds (n=274) physically active), distribution of Normalized Difference Vegetation Index (NDVI) values in the same geographic area (mean of 0.1 and SD of 0.05)<sup>3</sup>, and the relationship between NDVI and physical activity in other populations (difference of 0.02 between physically active and inactive)<sup>4</sup>, and accepting an alpha risk of 0.05 in a two-sided test, the statistical power to identify an association between NDVI and physical activity as statistically significant was 96%.

---

<sup>1</sup> Marrugat J, Vila J, Pavesi M, Sanz F. [Estimation of the sample size in clinical and epidemiological investigations]. *Med Clin (Barc)* 1998;111:267–76.

<sup>2</sup> Garcia-Aymerich J, Farrero E, Félez MA, Izquierdo J, Marrades RM, Antó JM. Risk factors of readmission to hospital for a COPD exacerbation: a prospective study. *Thorax* 2003;58:100–5.

<sup>3</sup> Dadvand P, Sunyer J, Basagaña X, Ballester F, Lertxundi A, Fernández-Somoano A, et al. Surrounding greenness and pregnancy outcomes in four Spanish birth cohorts. *Environ Health Perspect* 2012;120:1481–7

<sup>4</sup> Almanza E, Jerrett M, Dunton G, Seto E, Pentz MA. A study of community design, greenness, and physical activity in children using satellite, GPS and accelerometer data. *Health Place* 2012;18:46–54.

**Table S1. Description of the five municipalities included in the study**

|            | <b>Population (inhabitants)</b> | <b>Area (km<sup>2</sup>)</b> | <b>Density (inhabitants/km<sup>2</sup>)</b> |
|------------|---------------------------------|------------------------------|---------------------------------------------|
| Barcelona  | 1,602,386                       | 101.4                        | 15,810                                      |
| Badalona   | 217,210                         | 21.2                         | 10,255                                      |
| Mataró     | 124,280                         | 22.5                         | 5516                                        |
| Viladecans | 65,358                          | 20.4                         | 3203                                        |
| Gavà       | 46,326                          | 30.8                         | 1506                                        |

Source: Idescat. Institut d'Estadística de Catalunya. Pàgina principal [Internet]. [cited 2016 Apr 9]. Available from: <http://www.idescat.cat/>

**Table S2. Association between socio-demographic and clinical characteristics, and socio-environmental determinants in COPD patients.**

|                                                          | Dog walking |            | p-value | Grandparenting |            | p-value |
|----------------------------------------------------------|-------------|------------|---------|----------------|------------|---------|
|                                                          | No          | Yes        |         | No             | Yes        |         |
| Sex: men, n (%)                                          | 312 (86)    | 37 (76)    | 0.044   | 212 (84)       | 135 (88)   | 0.286   |
| Age (years), m (SD)                                      | 69.1 (8.3)  | 66.5 (8.9) | 0.037   | 68.4 (9.2)     | 69.5 (7)   | 0.211   |
| Education: primary or less, n (%)                        | 262 (72)    | 24 (49)    | <0.01   | 174 (61)       | 109 (39)   | 0.670   |
| Married or living with partner, n (%)                    | 272 (76)    | 39 (80)    | 0.535   | 170 (67)       | 139 (91)   | <0.01   |
| Low socio-economic status (SES): IV-V, n (%)             | 255 (71)    | 37 (76)    | 0.532   | 182 (73)       | 107 (37)   | 0.578   |
| Working status: active, n (%)                            | 35 (10)     | 4 (9)      | 0.771   | 30 (12)        | 9 (6)      | 0.042   |
| Smoking status: current, n (%)                           | 82 (23)     | 16 (33)    | 0.126   | 64 (25)        | 33 (21)    | 0.374   |
| Body mass index (BMI) (kg/m <sup>2</sup> ), m (SD)       | 28.4 (4.9)  | 28.7 (5.1) | 0.681   | 28.4 (5.1)     | 28.5 (4.5) | 0.920   |
| Dyspnoea (mMRC grade, 0-4), m (SD)                       | 1.1 (0.9)   | 1 (0.7)    | 0.333   | 1.2 (0.9)      | 1 (0.8)    | 0.083   |
| FEV <sub>1</sub> (% predicted), m (SD)                   | 55 (17)     | 62 (16)    | <0.01   | 55 (18)        | 58 (174)   | 0.092   |
| FEV <sub>1</sub> /FVC ratio, m (SD)                      | 55 (12)     | 57 (11)    | 0.196   | 54 (12)        | 56 (12)    | 0.885   |
| 6MWD (meters), m (SD)                                    | 482 (97)    | 507 (76)   | 0.087   | 480 (99)       | 496 (87)   | 0.091   |
| Health-related quality of life (CAT score, 0-40), m (SD) | 12.3 (7)    | 12 (7)     | 0.734   | 12.6 (7)       | 11.6 (7)   | 0.173   |
| Anxiety (HAD-A score, 0-21), m (SD)                      | 5.1 (4)     | 5.6 (4)    | 0.453   | 5.4 (4)        | 4.8 (4)    | 0.129   |
| Depression (HAD-D score, 0-21), m (SD)                   | 3.4 (3)     | 3.6 (4)    | 0.783   | 3.8 (4)        | 2.9 (3)    | 0.008   |
| Diabetes mellitus, n (%)                                 | 101 (29)    | 13 (27)    | 0.817   | 72 (29)        | 40 (26)    | 0.509   |
| Coronary heart disease, n (%)                            | 35 (10)     | 2 (4)      | 0.195   | 28 (11)        | 8 (5)      | 0.038   |
| Hypertension, n (%)                                      | 174 (49)    | 29 (60)    | 0.153   | 118 (48)       | 84 (55)    | 0.169   |
| Musculoskeletal diseases, n (%)                          | 129 (37)    | 25 (52)    | 0.039   | 100 (41)       | 54 (36)    | 0.293   |
| Comorbidities that could affect walking, n (%)           | 257 (86)    | 41 (14)    | 0.066   | 185 (63)       | 111 (38)   | 0.818   |

\*Some variables had missing values: 10 in diabetes, coronary heart disease, musculoskeletal diseases and hypertension, and 3 in grandparenting.

**Table S3. Association between socio-demographic and clinical characteristics, and physical activity in COPD patients.**

|                                                          | Time in moderate-to-vigorous physical activity |                |         | VMU/min       |                | p-value |
|----------------------------------------------------------|------------------------------------------------|----------------|---------|---------------|----------------|---------|
|                                                          | Low (<median)                                  | High (≥median) | p-value | Low (<median) | High (≥median) |         |
| Sex: men, n (%)                                          | 174 (85)                                       | 175 (85)       | 0.890   | 173 (84)      | 176 (86)       | 0.677   |
| Age (years), m (SD)                                      | 69.6 (8.4)                                     | 68 (8.4)       | 0.056   | 70.4 (8.5)    | 67.4 (8.2)     | <0.01   |
| Education: primary or less, n (%)                        | 136 (66)                                       | 150 (73)       | 0.132   | 143 (70)      | 143 (70)       | 0.998   |
| Married or living with partner, n (%)                    | 145 (71)                                       | 166 (81)       | 0.019   | 142 (70)      | 169 (82)       | <0.01   |
| Low socio-economic status (SES): IV-V, n (%)             | 138 (68)                                       | 154 (75)       | 0.127   | 137 (68)      | 155 (76)       | 0.081   |
| Working status: active, n (%)                            | 17 (9)                                         | 22 (11)        | 0.499   | 16 (8)        | 23 (12)        | 0.280   |
| Smoking status: current, n (%)                           | 60 (29)                                        | 38 (19)        | 0.011   | 53 (26)       | 45 (22)        | 0.354   |
| Body mass index (BMI) (kg/m <sup>2</sup> ), m (SD)       | 28.9 (5.4)                                     | 28 (4.3)       | 0.074   | 29.2 (5.2)    | 27.6           | <0.01   |
| Dyspnoea (mMRC grade, 0-4), m (SD)                       | 1.4 (0.9)                                      | 0.9 (0.7)      | <0.01   | 1.4 (1)       | 0.9 (0.7)      | <0.01   |
| FEV <sub>1</sub> (% predicted), m (SD)                   | 53 (17)                                        | 59 (17)        | <0.01   | 52 (17)       | 60 (16)        | <0.01   |
| FEV <sub>1</sub> /FVC ratio, m (SD)                      | 54 (13)                                        | 56 (12)        | 0.089   | 54 (14)       | 56 (12)        | 0.107   |
| 6MWD (meters), m (SD)                                    | 453 (101)                                      | 518 (76)       | <0.01   | 440 (95)      | 531 (70)       | <0.01   |
| Health-related quality of life (CAT score, 0-40), m (SD) | 13 (7)                                         | 11 (7)         | <0.01   | 14 (8)        | 11 (6)         | <0.01   |
| Anxiety (HAD-A score, 0-21), m (SD)                      | 5.1 (4)                                        | 5.2 (4)        | 0.830   | 4.9 (4)       | 5.4 (4)        | 0.177   |
| Depression (HAD-D score, 0-21), m (SD)                   | 3.9 (3.6)                                      | 3 (3)          | 0.008   | 3.8 (3.5)     | 3.1 (3.1)      | 0.023   |
| Diabetes mellitus, n (%)                                 | 63 (31)                                        | 51 (26)        | 0.229   | 69 (34)       | 45 (23)        | <0.01   |
| Coronary heart disease, n (%)                            | 18 (9)                                         | 19 (10)        | 0.813   | 23 (11)       | 14 (7)         | 0.128   |
| Hypertension, n (%)                                      | 102 (51)                                       | 101 (51)       | 0.918   | 110 (55)      | 93 (47)        | 0.110   |
| Musculoskeletal diseases, n (%)                          | 73 (36)                                        | 81 (41)        | 0.327   | 74 (37)       | 80 (40)        | 0.487   |
| Comorbidities that could affect walking, n (%)           | 151 (51)                                       | 147 (49)       | 0.658   | 150 (50)      | 148 (50)       | 0.825   |

\*Some variables had missing values: 10 in diabetes, coronary heart disease, musculoskeletal diseases and hypertension, and 3 in grandparenting.

**Table S4. Adjusted association between socio-environmental characteristics and secondary outcomes of physical activity amount in COPD patients.**

|                                    | Steps (num/day)       |         | Walking time (min/day) |         | Time in physical activity of any activity (min/day) |         |
|------------------------------------|-----------------------|---------|------------------------|---------|-----------------------------------------------------|---------|
|                                    | $\beta$ (95% CI)      | p-value | $\beta$ (95% CI)       | p-value | $\beta$ (95% CI)                                    | p-value |
| <b>Dog walking</b>                 | 1419 (331 to 2508)    | 0.01    | 18 (6 to 29)           | <0.01   | 21 (4 to 39)                                        | 0.01    |
| <b>Grandparenting</b>              | 644 (-96 to 1384)     | 0.09    | 7 (-0.5 to 15)         | 0.06    | 13 (0.7 to 25)                                      | 0.03    |
| <b>Age (years)</b>                 | -47 (-94 to 1)        | 0.06    | -0.5 (-1 to -0.3)      | 0.03    | -0.6 (-1.4 to 0.1)                                  | 0.12    |
| <b>Sex: male</b>                   | 309 (-751 to 1370)    | 0.57    | 5 (-6 to 16)           | 0.39    | -19 (-36 to -2)                                     | 0.03    |
| <b>Low SES: IV, V</b>              | 838 (30 to 1645)      | 0.04    | 8 (-0.4 to 16)         | 0.06    | 22 (8 to 35)                                        | <0.01   |
| <b>Active smoking</b>              | -1798 (-2655 to -941) | <0.01   | -18 (-27 to -9)        | <0.01   | -30 (-44 to -16)                                    | <0.01   |
| <b>Dyspnoea (mMRC, 0-4)</b>        | -782 (-1237 to -326)  | <0.01   | -8 (-13 to -3)         | <0.01   | -15 (-22 to -7)                                     | <0.01   |
| <b>6MWD (meters)</b>               | 12 (7 to 16)          | 0.30    | 0.6 (-0.07 to 0.16)    | <0.01   | 0.3 (0.2 to- 0.3)                                   | <0.01   |
| <b>Anxiety (HAD-A score, 0-21)</b> | 50 (-44 to 145)       | <0.01   | 0.7 (-0.3 to 1.6)      | 0.18    | 2 (0.6 to 4)                                        | <0.01   |

CI: confidence interval; VMU: vector magnitude units; SES: socio-economic status; mMRC: modified medical research council; 6MWD: six minute walking distance; HAD-A: hospital anxiety and depression scale-anxiety score.

\* Each column is a single linear regression multivariable model. Coefficients are expressed as minutes of time in activity or VMU/min (one at each time), per (i) each unit of the continuous covariates, or (ii) a change with respect to reference category in categorical covariates.

**Table S5. Adjusted\* association between socio-environmental characteristics and secondary outcomes of physical activity amount in COPD patients, according to sex, COPD severity, municipality and neighbourhood deprivation.**

|                       | Steps (num/day)                                      |                    |                                      |                                      |                          |                       |                      |                                |                              |                          |
|-----------------------|------------------------------------------------------|--------------------|--------------------------------------|--------------------------------------|--------------------------|-----------------------|----------------------|--------------------------------|------------------------------|--------------------------|
|                       | By sex                                               |                    | By COPD severity                     |                                      | By municipality          |                       |                      |                                | By neighbourhood deprivation |                          |
|                       | Women<br>n=61 (15%)                                  | Men<br>n=350 (85%) | FEV <sub>1</sub> ≥50%<br>n=225 (62%) | FEV <sub>1</sub> <50%<br>N=156 (38%) | Barcelona<br>n=189 (46%) | Badalona<br>n=29 (7%) | Mataró<br>n=73 (18%) | Viladecans/Gavà<br>n=120 (29%) | Low (<0.6 UVI)<br>n=181      | High (≥0.6 UVI)<br>n=226 |
| β (95% CI)            | β (95% CI)                                           | β (95% CI)         | β (95% CI)                           | β (95% CI)                           | β (95% CI)               | β (95% CI)            | β (95% CI)           | β (95% CI)                     | β (95% CI)                   |                          |
| <b>Dog walking</b>    | 1310 (-917 to 3536)                                  | 1866 (605 to 3127) | 1290 (44 to 2538)                    | 2038 (-203 to 4279)                  | 1928 (303 to 3553)       | nc                    | 293 (-2600 to 3186)  | 1928 (100 to 3757)             | -180 (-1732 to 1372)         | 2532 (924 to 4139)       |
| <b>Grandparenting</b> | -1094 (-2910 to 722)                                 | 952 (137 to 1766)  | 871 (-40 to 1781)                    | 128 (-1173 to 1429)                  | -4 (-1132 to 1124)       | 2914 (-89 to 5918)    | 1014 (-1019 to 3046) | 934 (-441 to 2309)             | 765 (-352 to 1882)           | 478 (-568 to 1523)       |
|                       | Walking time (min/day)                               |                    |                                      |                                      |                          |                       |                      |                                |                              |                          |
|                       | By sex                                               |                    | By COPD severity                     |                                      | By municipality          |                       |                      |                                | By neighbourhood deprivation |                          |
|                       | Women<br>n=61 (15%)                                  | Men<br>n=350 (85%) | FEV <sub>1</sub> ≥50%<br>n=225 (62%) | FEV <sub>1</sub> <50%<br>N=156 (38%) | Barcelona<br>n=189 (46%) | Badalona<br>n=29 (7%) | Mataró<br>n=73 (18%) | Viladecans/Gavà<br>n=120 (29%) | Low (<0.6 UVI)<br>n=181      | High (≥0.6 UVI)<br>n=226 |
| β (95% CI)            | β (95% CI)                                           | β (95% CI)         | β (95% CI)                           | β (95% CI)                           | β (95% CI)               | β (95% CI)            | β (95% CI)           | β (95% CI)                     | β (95% CI)                   |                          |
| <b>Dog walking</b>    | 15 (-8 to 38)                                        | 23 (10 to 36)      | 15 (2 to 28)                         | 27 (4 to 50)                         | 23 (6 to 40)             | nc                    | 4 (-25 to 32)        | 24 (6 to 42)                   | 1 (-15 to 17)                | 29 (13 to 46)            |
| <b>Grandparenting</b> | -12 (-31 to 7)†                                      | 10 (2 to 19)†      | 10 (1 to 19)                         | 2 (-11 to 16)                        | 1 (-11 to 13)            | 32 (0-1 to 63)        | 8 (-12 to 28)        | 11 (-3 to 24)                  | 8 (-4 to 19)                 | 6 (-5 to 17)             |
|                       | Time in physical activity of any intensity (min/day) |                    |                                      |                                      |                          |                       |                      |                                |                              |                          |
|                       | By sex                                               |                    | By COPD severity                     |                                      | By municipality          |                       |                      |                                | By neighbourhood deprivation |                          |
|                       | Women<br>n=61 (15%)                                  | Men<br>n=350 (85%) | FEV <sub>1</sub> ≥50%<br>n=225 (62%) | FEV <sub>1</sub> <50%<br>N=156 (38%) | Barcelona<br>n=189 (46%) | Badalona<br>n=29 (7%) | Mataró<br>n=73 (18%) | Viladecans/Gavà<br>n=120 (29%) | Low (<0.6 UVI)<br>n=181      | High (≥0.6 UVI)<br>n=226 |
| β (95% CI)            | β (95% CI)                                           | β (95% CI)         | β (95% CI)                           | β (95% CI)                           | β (95% CI)               | β (95% CI)            | β (95% CI)           | β (95% CI)                     | β (95% CI)                   |                          |
| <b>Dog walking</b>    | 11 (-36 to 58)                                       | 28 (8 to 48)       | 19 (-3 to 41)                        | 29 (-4 to 62)                        | 44 (18 to 70)            | nc                    | 16 (-61 to 27)       | 20 (-10 to 50)                 | 16 (-9 to 41)                | 22 (-4 to 49)            |
| <b>Grandparenting</b> | -11 (-50 to 27)                                      | 17 (4 to 30)       | 21 (5 to 37)                         | -1 (-19 to 19)                       | 4 (-14 to 22)            | 67 (12 to 123)        | 13 (-18 to 44)       | 7 (-15 to 30)                  | 17 (-1 to 35)                | 10 (-7 to 28)            |

VMU: vector magnitude units; FEV<sub>1</sub>: forced expiratory volume in the first second; UVI: urban vulnerability index; nc: non computable. CI: confidence interval.

\* Models adjusted for age, sex, socio-economic status, dyspnea, 6MWD, and HAD-anxiety.

† P-for-interaction between grandparenting and sex in time in walking time=0.03.

**Table S6. Adjusted association between socio-environmental characteristics and physical activity amount and intensity (all parameters) in COPD patients, after excluding patients with extreme values in ( $\geq 99^{\text{th}}$  percentile) physical activity variables.**

|                                    | Time in physical activity of moderate-to-vigorous intensity (min/day) |         | VMU/min           |         | Steps (num/day)       |         | Walking time (min/day) |         | Time in physical activity of any activity (min/day) |         |
|------------------------------------|-----------------------------------------------------------------------|---------|-------------------|---------|-----------------------|---------|------------------------|---------|-----------------------------------------------------|---------|
|                                    | $\beta$ (95% CI)                                                      | p-value | $\beta$ (95% CI)  | p-value | $\beta$ (95% CI)      | p-value | $\beta$ (95% CI)       | p-value | $\beta$ (95% CI)                                    | P-value |
| <b>Dog walking</b>                 | 17 (5 to 29)                                                          | <0.01   | 49 (-5 to 102)    | 0.07    | 1264 (244 to 2283)    | 0.02    | 16 (5 to 26)           | <0.01   | 14 (-5 to 31)                                       | 0.14    |
| <b>Grandparenting</b>              | 7 (-1 to 16)                                                          | 0.08    | 30 (-5 to 65)     | 0.09    | 404 (-287 to 1095)    | 0.25    | 6 (1 to 13)            | 0.11    | 11 (-0.7 to 23)                                     | 0.06    |
| <b>Age (y)</b>                     | -0.6 (-1 to -0.06)                                                    | 0.02    | -1 (-3 to 1)      | 0.44    | -33 (-77 to 12)       | 0.25    | -0.3 (-0.8 to 0.1)     | 0.14    | -0.5 (-1 to 0.3)                                    | 0.18    |
| <b>Sex: male</b>                   | 1 (-11 to 13)                                                         | 0.87    | 2 (-49 to 52)     | 0.94    | 96 (-891 to 1083)     | 0.85    | 2 (-8 to 13)           | 0.14    | -17 (-34 to 0.02)                                   | 0.05    |
| <b>Low SES: IV, V</b>              | 9 (-0.4 to 18)                                                        | 0.06    | 34 (-5 to 74)     | 0.08    | 614 (-142 to 1370)    | 0.11    | 6 (-2 to 14)           | 0.12    | 22 (10 to 35)                                       | <0.01   |
| <b>Active smoking</b>              | -18 (-27 to -8)                                                       | <0.01   | -76 (-116 to -35) | <0.01   | -1553 (-2351 to -755) | <0.01   | -15 (-23 to -7)        | <0.01   | -31 (45 to 17)                                      | <0.01   |
| <b>Dyspnoea (mMRC, 0-4)</b>        | -19 (-15 to 0.2)                                                      | <0.01   | -42 (-63 to -20)  | <0.01   | -704 (-1129 to -280)  | <0.01   | -7 (-12 to 3)          | <0.01   | -14 (-21 to -6)                                     | <0.01   |
| <b>6MWD (m)</b>                    | 0.1 (0.1 to 0.2)                                                      | <0.01   | 0.8 (0.6 to 1)    | <0.01   | 12 (8 to 16)          | 0.24    | 0.1 (0.7 to 0.2)       | <0.01   | 0.2 (0.2 to 0.3)                                    | <0.01   |
| <b>Anxiety (HAD-A score, 0-21)</b> | 1 (0.02 to 2)                                                         | 0.04    | 7 (2 to 11)       | <0.01   | 53 (-35 to 142)       | <0.01   | 0.6 (-0.3 to 1.5)      | 0.23    | 2 (0.6 to 4)                                        | <0.01   |

CI: confidence interval; VMU: vector magnitude units; SES: socio-economic status; mMRC: modified medical research council; 6MWD: six minute walking distance; HAD-A: hospital anxiety and depression scale-anxiety score.



**Table S7. Adjusted association between socio-environmental characteristics and physical activity amount and intensity (all parameters) in COPD patients, using a mixed effect models to account for the potential correlation between subjects within a municipality.**

|                                    | Time in physical activity of moderate-to-vigorous intensity (min/day) |         | VMU/min            |         | Steps (num/day)       |         | Walking time (min/day) |         | Time in physical activity of any activity (min/day) |         |
|------------------------------------|-----------------------------------------------------------------------|---------|--------------------|---------|-----------------------|---------|------------------------|---------|-----------------------------------------------------|---------|
|                                    | $\beta$ (95% CI)                                                      | p-value | $\beta$ (95% CI)   | p-value | $\beta$ (95% CI)      | p-value | $\beta$ (95% CI)       | p-value | $\beta$ (95% CI)                                    | p-value |
| <b>Dog walking</b>                 | 19 (6 to 32)                                                          | <0.01   | 88 (13 to 163)     | 0.02    | 1419 (348 to 2491)    | 0.01    | 18 (6 to 29)           | <0.01   | 21 (4 to 39)                                        | 0.01    |
| <b>Grandparenting</b>              | 8 (-0.3 to 17)                                                        | 0.06    | 55 (4 to 106)      | 0.03    | 644 (-85 to 1372)     | 0.08    | 7 (-0.5 to 15)         | 0.06    | 13 (1 to 25)                                        | 0.03    |
| <b>Age (y)</b>                     | -0.7 (-1 to -0.1)                                                     | 0.01    | -4 (-7 to -0.3)    | 0.03    | -47 (-94 to 0)        | 0.05    | -0.5 (-1 to -0.3)      | 0.03    | -0.6 (-1 to 0.1)                                    | 0.12    |
| <b>Sex: male</b>                   | 3 (-9 to 15)                                                          | 0.62    | 24 (-49 to 97)     | 0.51    | 309 (-735 to 1353)    | 0.56    | 5 (-6 to 16)           | 0.39    | -19 (36 to -2)                                      | 0.03    |
| <b>Low SES: IV-V</b>               | 10 (1 to 20)                                                          | 0.03    | 86 (29 to 142)     | <0.01   | 838 (43 to 1632)      | 0.04    | 8 (-0.5 to 16)         | 0.06    | 22 (8 to 35)                                        | <0.01   |
| <b>Active smoking</b>              | -20 (-30 to -10)                                                      | <0.01   | -148 (-207 to -89) | <0.01   | -1798 (-2642 to -954) | <0.01   | -18 (27 to -9)         | <0.01   | -30 (-44 to -16)                                    | <0.01   |
| <b>Dyspnoea (mMRC, 0-4)</b>        | -11 (-16 to -5)                                                       | <0.01   | -59 (-91 to -27)   | <0.01   | -782 (-1230 to -333)  | <0.01   | -8 (-13 to -3)         | <0.01   | -15 (-22 to -7)                                     | <0.01   |
| <b>6MWD (m)</b>                    | 0.01 (0.09 to 0.2)                                                    | <0.01   | 1.1 (0.8 to 1.4)   | <0.01   | 12 (7 to 16)          | 0.30    | 0.1 (0.07 to 0.1)      | <0.01   | 0.3 (0.2 to 0.3)                                    | <0.01   |
| <b>Anxiety (HAD-A score, 0-21)</b> | 1 (0.1 to 2)                                                          | 0.04    | 3 (-4 to 9)        | 0.40    | 50 (-43 to 143)       | <0.01   | 0.6 (-0.3 to 2)        | 0.18    | 2 (0.6 to 4)                                        | <0.01   |

CI: confidence interval; VMU: vector magnitude units; SES: socio-economic status; mMRC: modified medical research council; 6MWD: six minute walking distance; HAD-A: hospital anxiety and depression scale-anxiety score.

**Figure S1. Distribution of physical activity amount and intensity according to residential surrounding greenness within different buffers using network and Euclidean distances in COPD patients.**

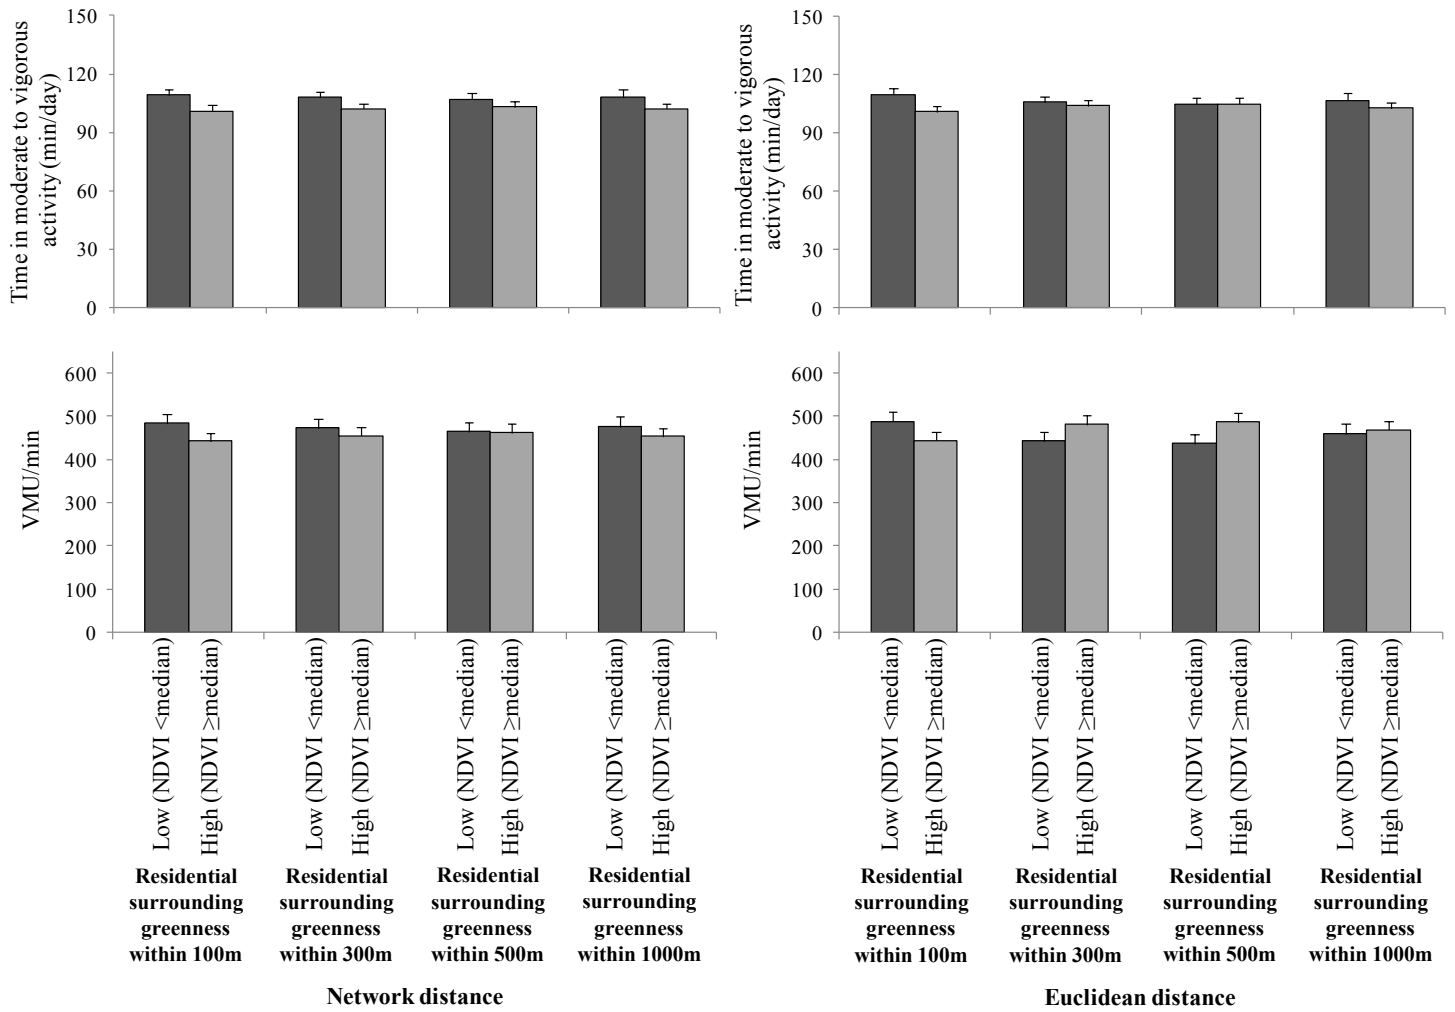

VMU: vector magnitude units; NDVI: Normalized Difference Vegetation Index. Bars represent mean and standard error.
